# Supplementary figures and images for: Serious Game with Electromyography Feedback and Physical Therapy in Young Children with Unilateral Spastic Cerebral Palsy and Equinus Gait: A Prospective Open-Label Study
Source: MDPI journal article supplement (doi:10.3390/s24051513), 2024-02-26

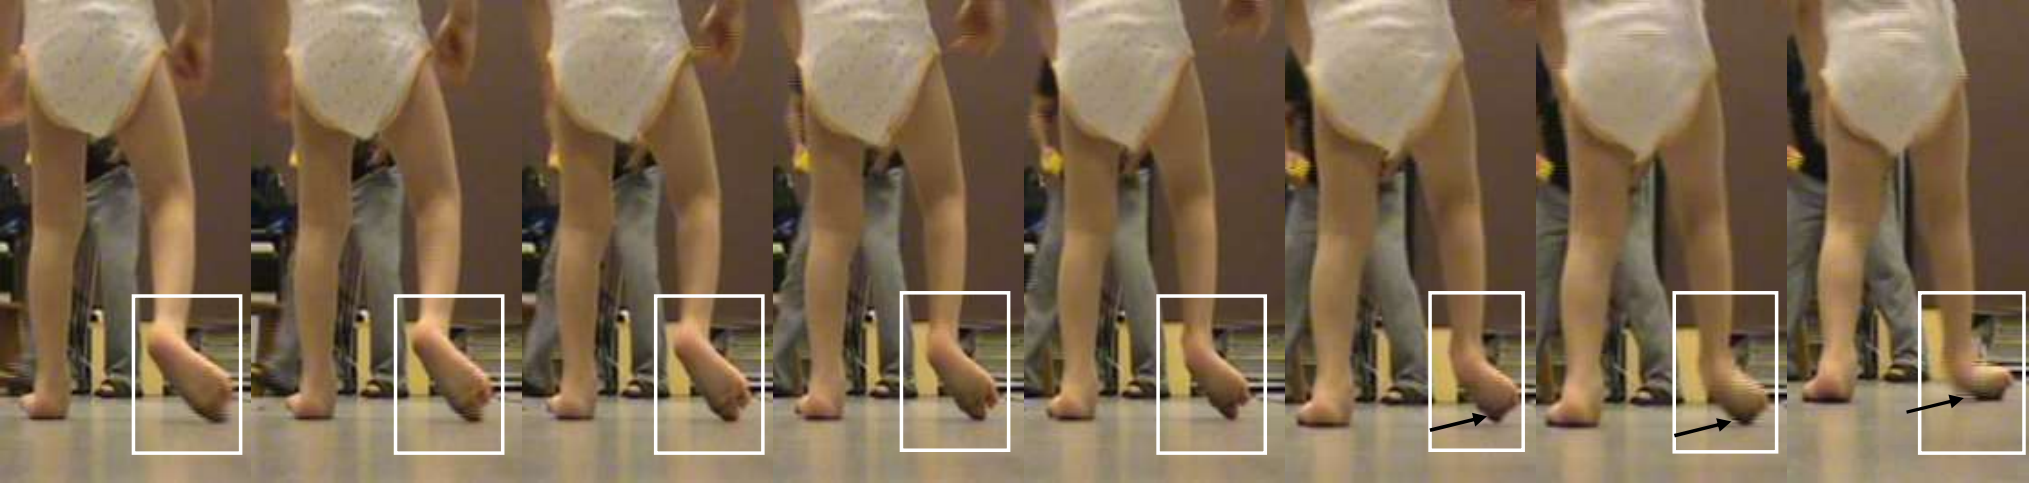

Supplement: s1 [file s1]

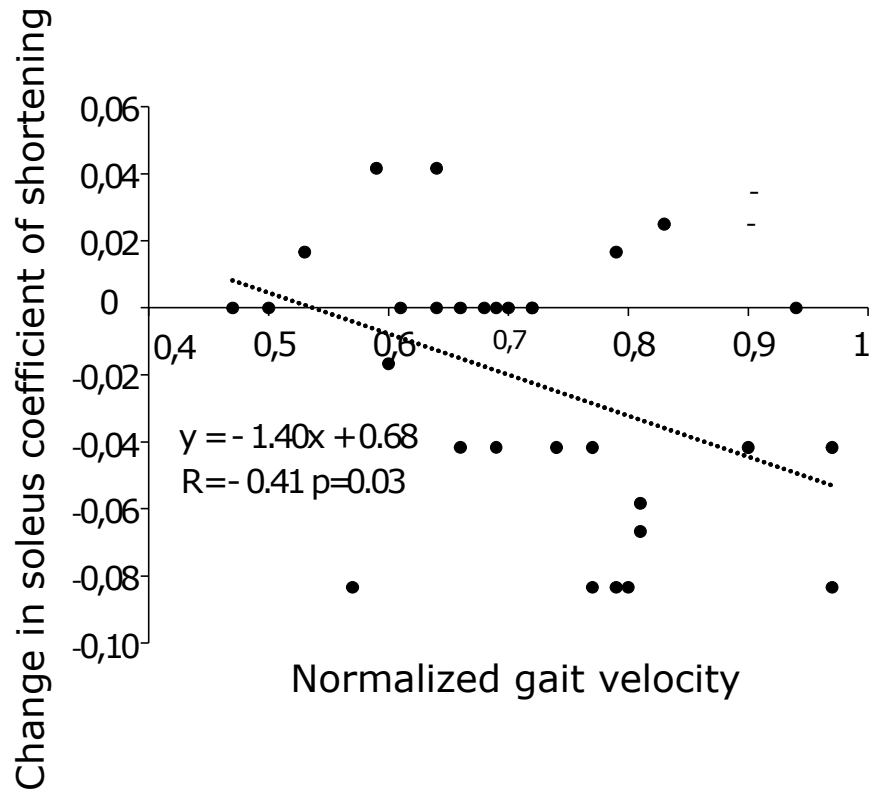

Supplement: s1 [file s1]
